# Supplementary material for: Synthesis and properties of linseed oil-based waterborne non-isocyanate polyurethane coating
Source: Royal Society of Chemistry journal article supplement (doi:10.1039/d3gc03249c), 2023-01-01
Supplement: d3gc03249c1.pdf [file d3gc03249c1.pdf]

## Supplementary Information

### Synthesis and Properties of Linseed Oil-Based Waterborne Non-isocyanate Polyurethane Coating

Zichen Ling, Qixin Zhou \*

Department of Chemical, Biomolecular, and Corrosion Engineering, The University of Akron,  
Akron, Ohio, 44325, United States

\*: corresponding author

E-mail: [qzhou@uakron.edu](mailto:qzhou@uakron.edu)

(a)

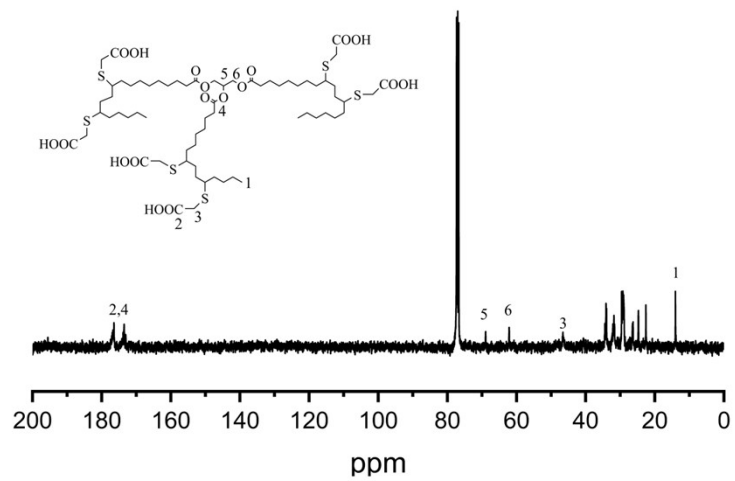

(b)

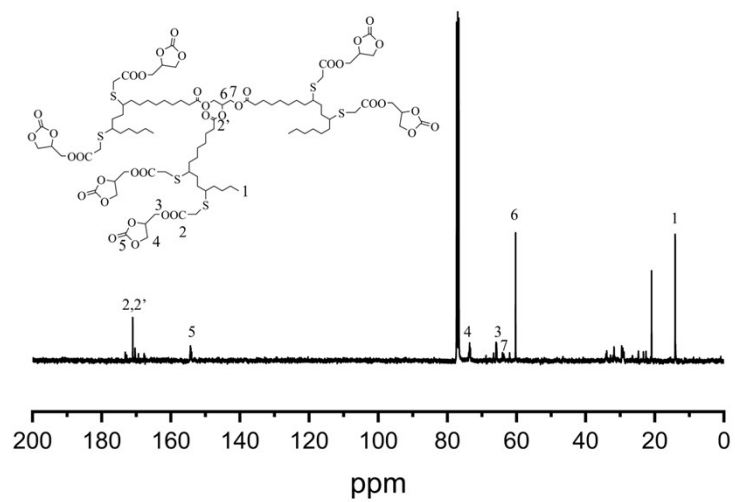

Fig. S1.  $^{13}\text{C}$  NMR spectra of (a) LOAC and (b) LOCC.

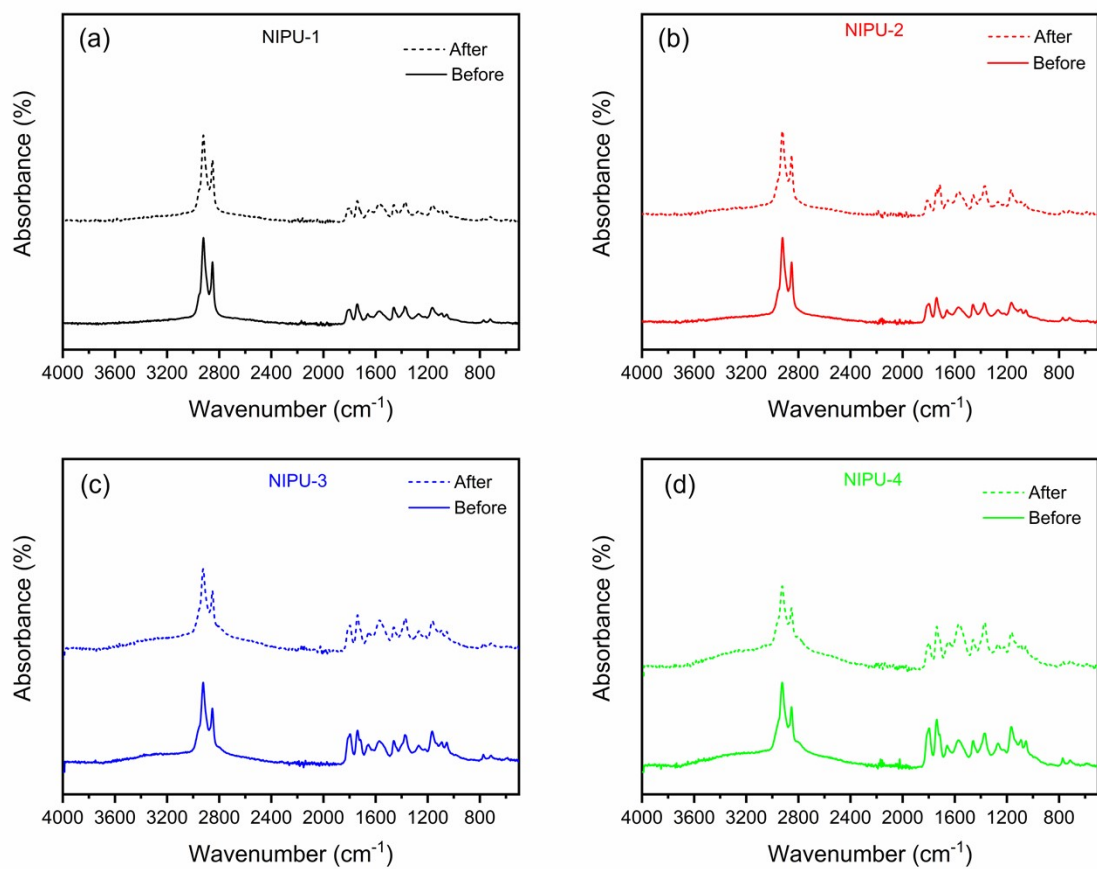

Fig. S2. FTIR spectra of (a) NIPU-1, (b) NIPU-2, (c) NIPU-3, and (d) NIPU-4 prepolymer before and after 6 h reaction.

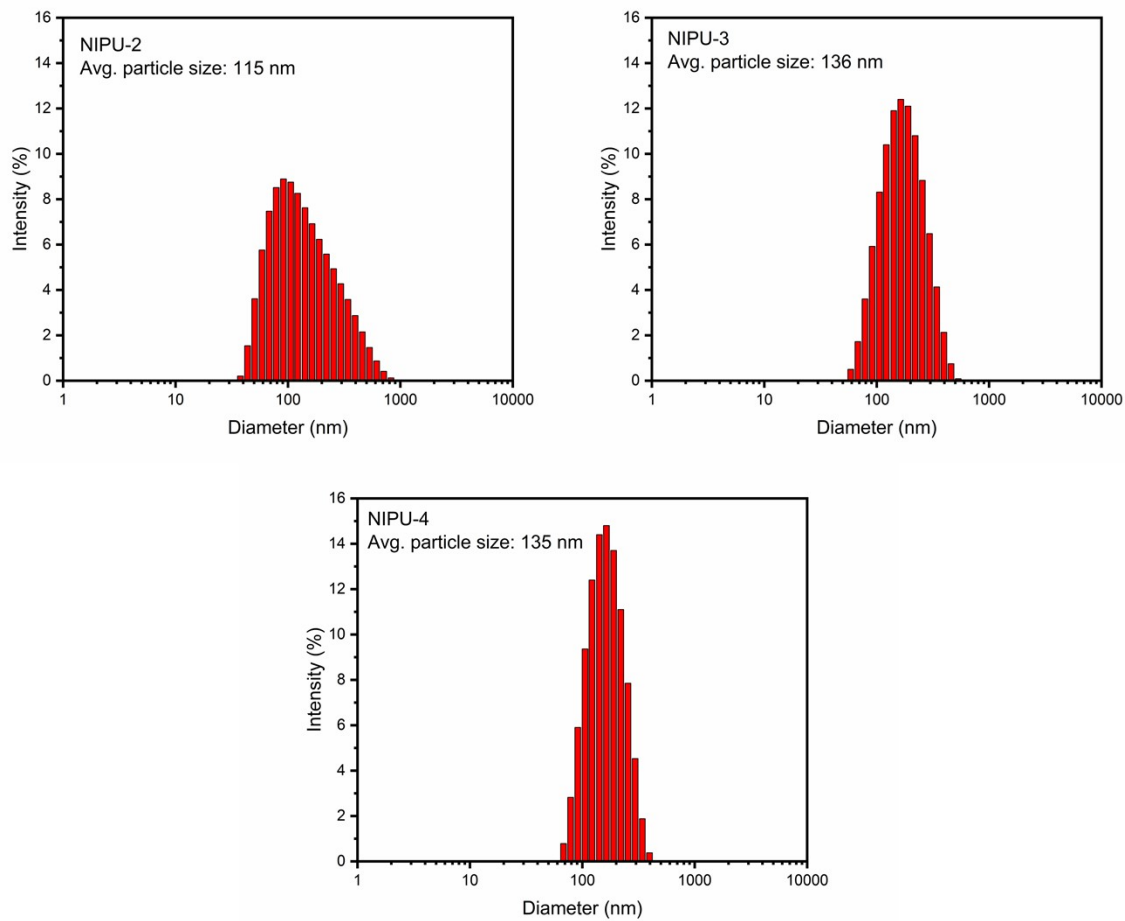

Fig. S3. Particle size distribution of waterborne NIPU dispersions.

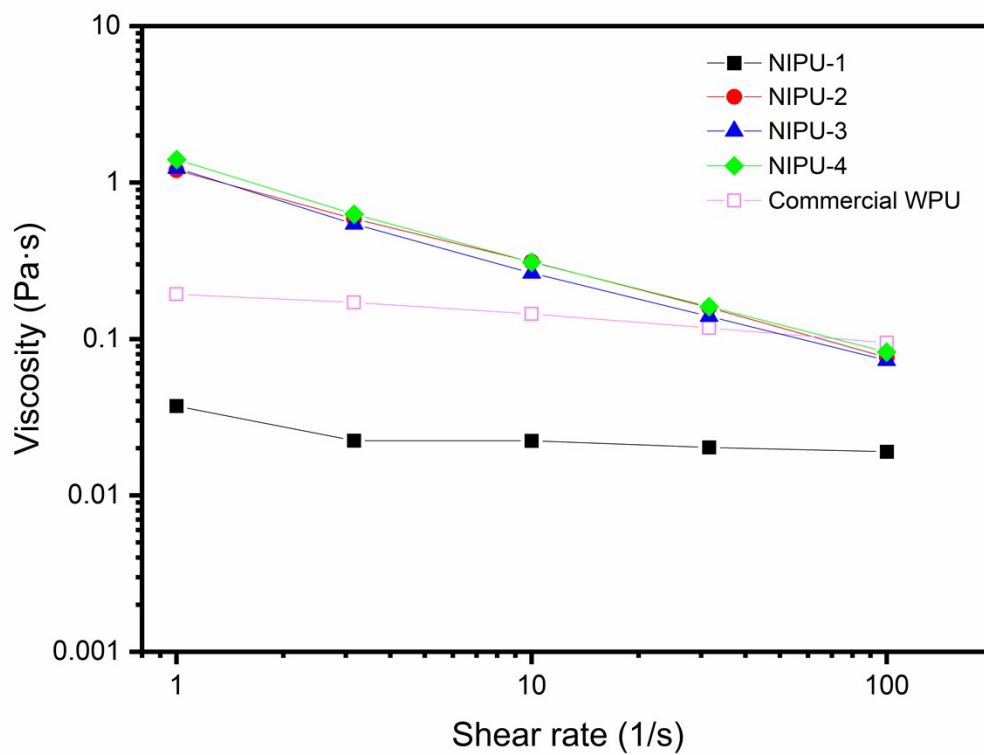

Fig. S4. Viscosity of NIPU dispersions and commercial WPU.
